# Supplementary material for: Facile and robust fabrication of hierarchical Au nanorods/Ag nanowire SERS substrates for the sensitive detection of dyes and pesticides
Source: Royal Society of Chemistry journal article supplement (doi:10.1039/d1ay02080c), 2022-01-01
Supplement: d1ay02080c1.pdf [file d1ay02080c1.pdf]

# Supporting Information

## **Facile and Robust Fabrication of Hierarchical Au Nanorods/Ag Nanowires SERS Substrate for the Sensitive Detection of Dyes and Pesticides**

Shiqiang Wang, Bing Sun\*, Huiyun Jiang, Yan Jin, Junjie Feng, Fei An,

Haozhi Wang, Wei Xu

*State Key Laboratory of Safety and Control for Chemicals, SINOPEC Research Institute of Safety  
Engineering Co., Ltd., Qingdao, Shandong 266071, People's Republic of China.*

*\* Corresponding author*

*E-mail: sunb.qday@sinopec.com*

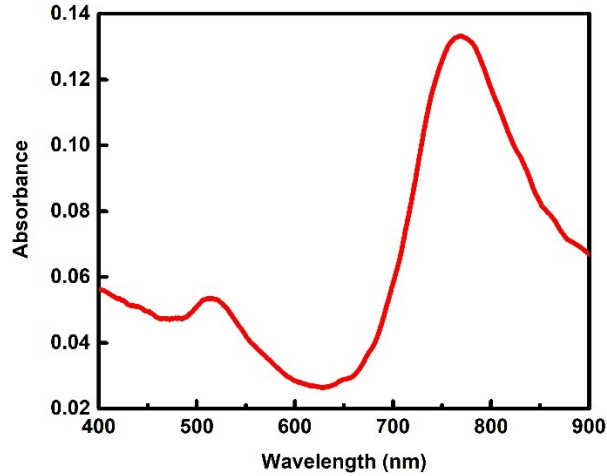

Fig. S1. The UV-Vis spectrum of Au nanorods.

10  $\mu\text{L}$  ethanol solution of Ag nanowires (50 mg/ml), 10  $\mu\text{L}$  aqueous solution of Au nanorods (20 mg/ml) were dripped onto the glass substrates, respectively. After several minutes, the solvent completely evaporated and the samples were applied to the Raman test. As shown in Fig. S2, the Raman spectra of Ag nanowires and Au nanorods displayed low intensity that could be ignored in the experiment.

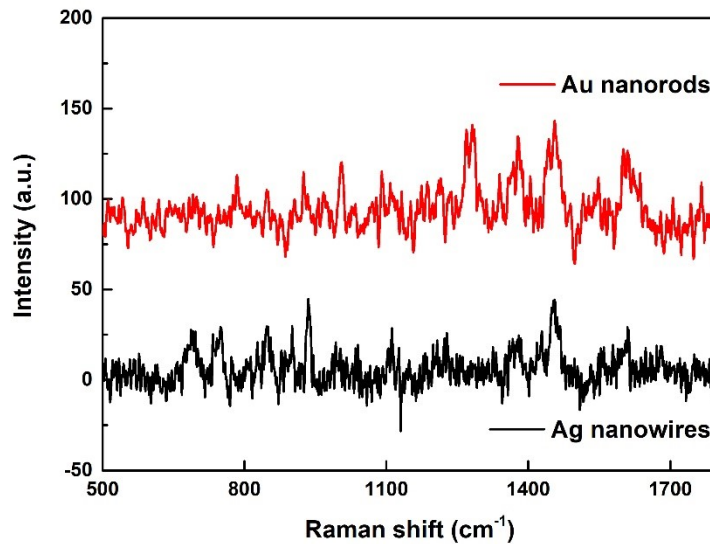

Fig. S2. The Raman spectra of Ag nanowires and Au nanorods.

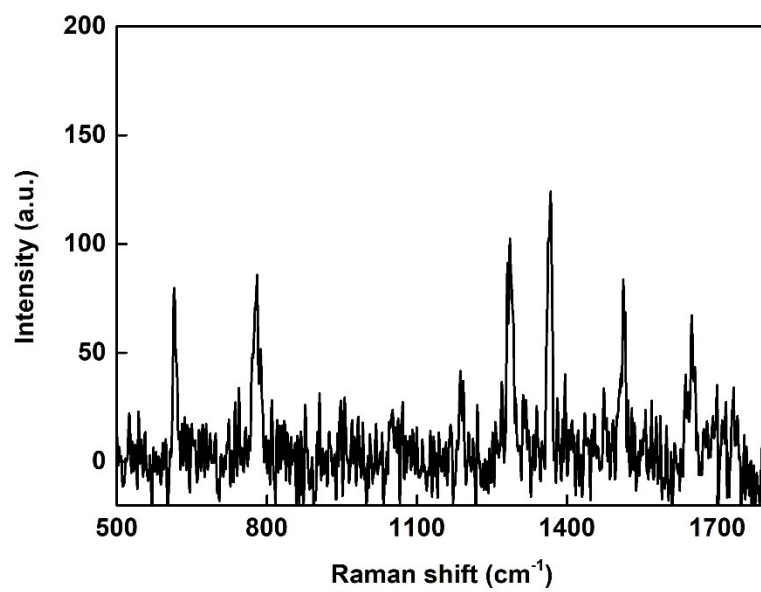

**Fig. S3.** The Raman spectra of 10-2 M R6G on the glass substrate.
